# Supplementary material for: Developing and testing an automated qualitative assistant (AQUA) to support qualitative analysis
Source: HighWire-hosted journal article supplement (doi:10.1136/fmch-2021-001287), 2021-11-01
Supplement: fmch-2021-001287supp001_data_supplement.pdf [file fmch-2021-001287supp001_data_supplement.pdf]

## Supplemental Material

Table of Kappa values evaluating the inter-rater reliability or agreement between human-coders and supervised training of all 3-topic training models. Topic labels are 1: Distrust, 2: Media Messaging, 3: Trusted Sources of Information, 4: Personal Medical Concerns, 5: Family Concerns, 6: Societal Concerns, 7: Barriers to Recommendations, 8: No Worries, 9: Other Broad.

| Topics | Train Percentage |                 |                 |                 |
|--------|------------------|-----------------|-----------------|-----------------|
|        | 0.2              | 0.4             | 0.6             | 0.8             |
| 245    | 0.67 (+/- 0.04)  | 0.69 (+/- 0.03) | 0.71 (+/- 0.03) | 0.72 (+/- 0.06) |
| 145    | 0.67 (+/- 0.02)  | 0.71 (+/- 0.02) | 0.70 (+/- 0.02) | 0.72 (+/- 0.02) |
| 124    | 0.67 (+/- 0.01)  | 0.70 (+/- 0.02) | 0.68 (+/- 0.03) | 0.70 (+/- 0.04) |
| 157    | 0.65 (+/- 0.01)  | 0.67 (+/- 0.03) | 0.67 (+/- 0.02) | 0.70 (+/- 0.04) |
| 257    | 0.68 (+/- 0.02)  | 0.70 (+/- 0.01) | 0.71 (+/- 0.02) | 0.70 (+/- 0.02) |
| 345    | 0.64 (+/- 0.03)  | 0.67 (+/- 0.03) | 0.68 (+/- 0.03) | 0.69 (+/- 0.05) |
| 247    | 0.65 (+/- 0.02)  | 0.68 (+/- 0.01) | 0.68 (+/- 0.01) | 0.69 (+/- 0.03) |
| 235    | 0.62 (+/- 0.07)  | 0.61 (+/- 0.08) | 0.61 (+/- 0.05) | 0.68 (+/- 0.08) |
| 256    | 0.63 (+/- 0.03)  | 0.66 (+/- 0.01) | 0.68 (+/- 0.02) | 0.68 (+/- 0.02) |
| 135    | 0.66 (+/- 0.02)  | 0.66 (+/- 0.02) | 0.67 (+/- 0.05) | 0.67 (+/- 0.06) |
| 147    | 0.62 (+/- 0.02)  | 0.66 (+/- 0.02) | 0.68 (+/- 0.03) | 0.67 (+/- 0.03) |
| 156    | 0.61 (+/- 0.03)  | 0.66 (+/- 0.02) | 0.67 (+/- 0.02) | 0.66 (+/- 0.03) |
| 134    | 0.66 (+/- 0.04)  | 0.64 (+/- 0.04) | 0.64 (+/- 0.04) | 0.65 (+/- 0.03) |
| 234    | 0.58 (+/- 0.06)  | 0.60 (+/- 0.05) | 0.61 (+/- 0.08) | 0.64 (+/- 0.11) |
| 356    | 0.59 (+/- 0.03)  | 0.61 (+/- 0.02) | 0.64 (+/- 0.01) | 0.64 (+/- 0.03) |
| 357    | 0.60 (+/- 0.02)  | 0.65 (+/- 0.01) | 0.65 (+/- 0.02) | 0.64 (+/- 0.03) |
| 126    | 0.61 (+/- 0.02)  | 0.63 (+/- 0.01) | 0.64 (+/- 0.02) | 0.64 (+/- 0.02) |
| 347    | 0.63 (+/- 0.01)  | 0.63 (+/- 0.01) | 0.64 (+/- 0.03) | 0.64 (+/- 0.02) |
| 127    | 0.65 (+/- 0.03)  | 0.61 (+/- 0.00) | 0.62 (+/- 0.03) | 0.62 (+/- 0.04) |
| 236    | 0.56 (+/- 0.03)  | 0.61 (+/- 0.02) | 0.59 (+/- 0.03) | 0.62 (+/- 0.04) |
| 267    | 0.59 (+/- 0.01)  | 0.62 (+/- 0.01) | 0.61 (+/- 0.01) | 0.62 (+/- 0.04) |
| 136    | 0.59 (+/- 0.04)  | 0.62 (+/- 0.01) | 0.62 (+/- 0.02) | 0.62 (+/- 0.02) |
| 567    | 0.56 (+/- 0.02)  | 0.57 (+/- 0.02) | 0.58 (+/- 0.03) | 0.61 (+/- 0.03) |
| 167    | 0.57 (+/- 0.01)  | 0.61 (+/- 0.03) | 0.60 (+/- 0.02) | 0.61 (+/- 0.01) |
| 367    | 0.57 (+/- 0.02)  | 0.60 (+/- 0.01) | 0.60 (+/- 0.02) | 0.60 (+/- 0.02) |
| 146    | 0.54 (+/- 0.02)  | 0.57 (+/- 0.02) | 0.59 (+/- 0.01) | 0.58 (+/- 0.03) |
| 246    | 0.53 (+/- 0.04)  | 0.58 (+/- 0.01) | 0.58 (+/- 0.02) | 0.58 (+/- 0.02) |
| 346    | 0.52 (+/- 0.02)  | 0.55 (+/- 0.02) | 0.56 (+/- 0.03) | 0.56 (+/- 0.06) |
| 137    | 0.56 (+/- 0.03)  | 0.57 (+/- 0.04) | 0.58 (+/- 0.05) | 0.55 (+/- 0.04) |
| 123    | 0.51 (+/- 0.04)  | 0.54 (+/- 0.02) | 0.52 (+/- 0.05) | 0.53 (+/- 0.05) |

|     |                 |                 |                 |                 |
|-----|-----------------|-----------------|-----------------|-----------------|
| 457 | 0.48 (+/- 0.02) | 0.52 (+/- 0.02) | 0.52 (+/- 0.01) | 0.53 (+/- 0.03) |
| 467 | 0.50 (+/- 0.03) | 0.52 (+/- 0.03) | 0.54 (+/- 0.03) | 0.53 (+/- 0.02) |
| 456 | 0.43 (+/- 0.03) | 0.49 (+/- 0.05) | 0.48 (+/- 0.06) | 0.50 (+/- 0.06) |
| 237 | 0.50 (+/- 0.02) | 0.49 (+/- 0.05) | 0.48 (+/- 0.05) | 0.47 (+/- 0.05) |
